# Supplementary material for: Influence of Intramineral Proteins on the Growth of Carbonate Crystals Using as a Scaffold Membranes of Ratite Birds and Crocodiles Eggshells
Source: MDPI journal article supplement (doi:10.3390/membranes13110869), 2023-11-01
Supplement: s1 [file s1]

# Influence of Intramineral Proteins on the Growth of Carbonate Crystals Using as a Scaffold Membranes of Ratite Birds and Crocodiles Eggshells

Nerith R. Elejalde-Cadena <sup>1,2</sup>, Denisse Hernández <sup>2</sup>, Francesco Capitelli <sup>3</sup>, Selene R. Islas <sup>4</sup>, Maria J. Rosales-Hoz <sup>5</sup>, Michele Zema <sup>6,7</sup>, Serena C. Tarantino <sup>8,9</sup>, Dritan Siliqi <sup>7,\*</sup> and Abel Moreno <sup>2,\*</sup>

<sup>1</sup> Institute of Physics, National Autonomous University of Mexico, Circuito de la Investigación Científica s/n, Ciudad Universitaria, Ciudad de Mexico 045010, Mexico; rocioec@fisica.unam.mx

<sup>2</sup> Institute of Chemistry, National Autonomous University of Mexico, Av. Universidad 3000, Ciudad de Mexico 04510, Mexico; carcamo@unam.mx (A.M.); 316298290@quimica.unam.mx (D.H.)

<sup>3</sup> Institute of Crystallography (IC), National Research Council (CNR), Via Salaria km 29,300, 00016 Rome, Italy; francesco.capitelli@ic.cnr.it

<sup>4</sup> Instituto de Ciencias Aplicadas y Tecnología, Universidad Nacional Autónoma de México, Circuito Exterior s/n, Cd. Universitaria, Ciudad de Mexico 045010, Mexico; selene.islas@icat.unam.mx

<sup>5</sup> Departamento de Química, Centro de Investigación y de Estudios Avanzados, Av. Instituto Politécnico Nacional 2508, Col. San Pedro Zacatenco, Ciudad de Mexico 07360, Mexico; mrosales@cinvestav.mx

<sup>6</sup> Department of Earth and Geoenvironmental Sciences, University of Bari “Aldo Moro”, Via E. Orabona 4, 70125 Bari, Italy; michele.zema@uniba.it

<sup>7</sup> Institute of Crystallography (IC), National Research Council (CNR), Via Amendola 122/O, 70126 Bari, Italy

<sup>8</sup> Department of Chemistry, University of Pavia, Vialle Taramelli 16, 27100 Pavia, Italy; serenachiara.tarantino@unipv.it

<sup>9</sup> Institute of Geoscience and Georesources (IGG), National Research Council (CNR), Via Ferrata 1, 27100 Pavia, Italy

\* Correspondence: dritan.siliqi@ic.cnr.it (D.S.); carcamo@unam.mx (A.M.)

**Keywords:** Membrane; Eggshell; Biomineralization; Intramineral proteins; Biocalcification; Biosilicification; Biomorphs.

Supplementary information includes the following information:

## 1. Identification of Intramineral Proteins by SDS-PAGE

**Table S1.** Fractions collected from injections made with 50 mM sodium citrate + 150 mM NaOH pH 4.0 at a flow rate of 0.5 mL/min. Fractions were collected every 1 mL and the volume in mL of the collected fractions is given. **Fxn:** Fraction.

| Fxn     | 1    | 2    | 3    | 4    | 5    | 6    |
|---------|------|------|------|------|------|------|
| Ostrich | 17.5 | 18   | 18.5 | 19   | 19.5 | 20   |
| Emu     | 19   | 19.5 | 20   | 20.5 | 21   | 21.5 |

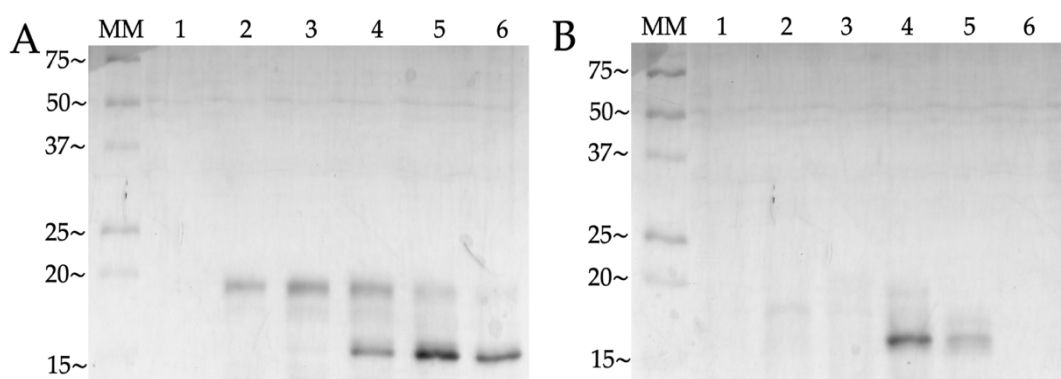

**Figure S1.** The fractions taken for the SDS-PAGE gel from ostrich (A) and emu (B) are listed in Table 1S with their respective volumes. The molecular weight marker (MM) corresponds to Prestained Protein Ladder (10 - 245 kDa).

**Table S2.** Fractions collected from injections made with 50 mM sodium citrate + 150 mM NaOH pH 4.0 at a flow rate of 0.5 mL/min. Fractions were collected every 1 mL and the volume in mL of the collected fractions is given. **Fxn:** Fraction.

| Fxn                 | 1  | 2    | 3  | 4    | 5  | 6    | 7  | 8    |
|---------------------|----|------|----|------|----|------|----|------|
| <i>C. Acutus</i>    | 13 | 13.5 | 14 | 14.5 | 15 | 15.5 | 16 | 16.5 |
| <i>C. Moreletti</i> | 13 | 13.5 | 14 | 14.5 | 15 | 15.5 | 16 | --   |

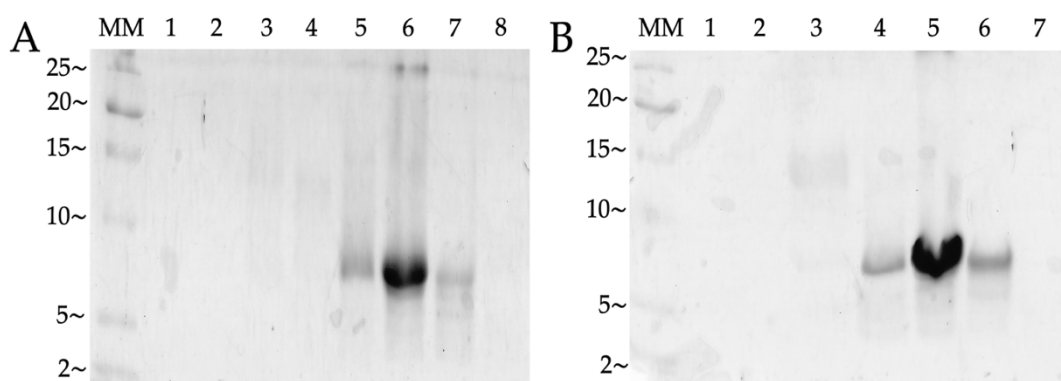

**Figure S2.** The fractions taken for the SDS-PAGE gel from crocodile *acutus* (A) and crocodile *moreletti* (B) are listed in Table 2S with their respective volumes. The molecular weight marker (MM) corresponds to Prestained Protein Ladder (10 - 245 kDa).

## 2. Mass Spectrometry of Intramineral Proteins

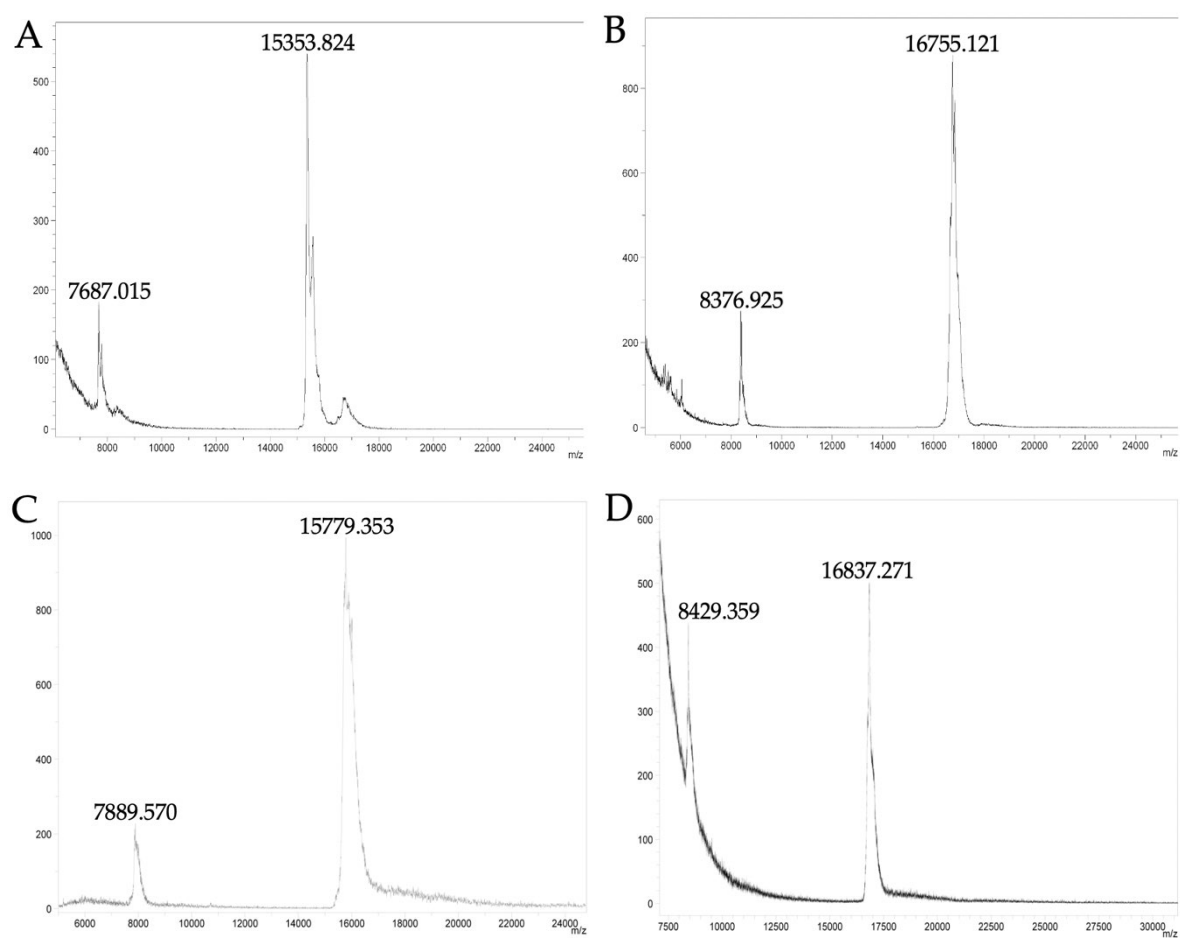

**Figure S3.** Mass spectra of intramineral proteins SCA-1 (A), SCA-2 (B), DCA-1 (C), and DCA-2 (D).

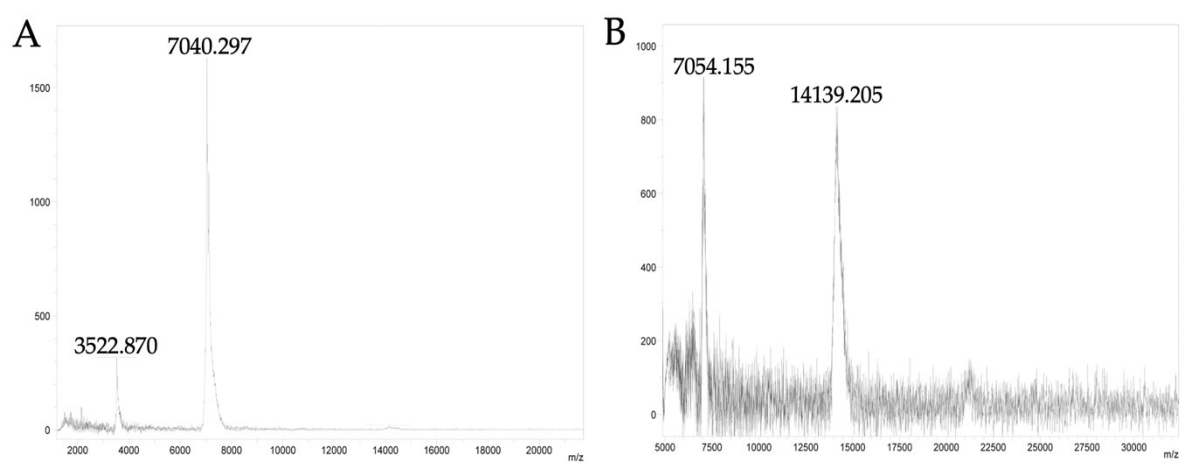

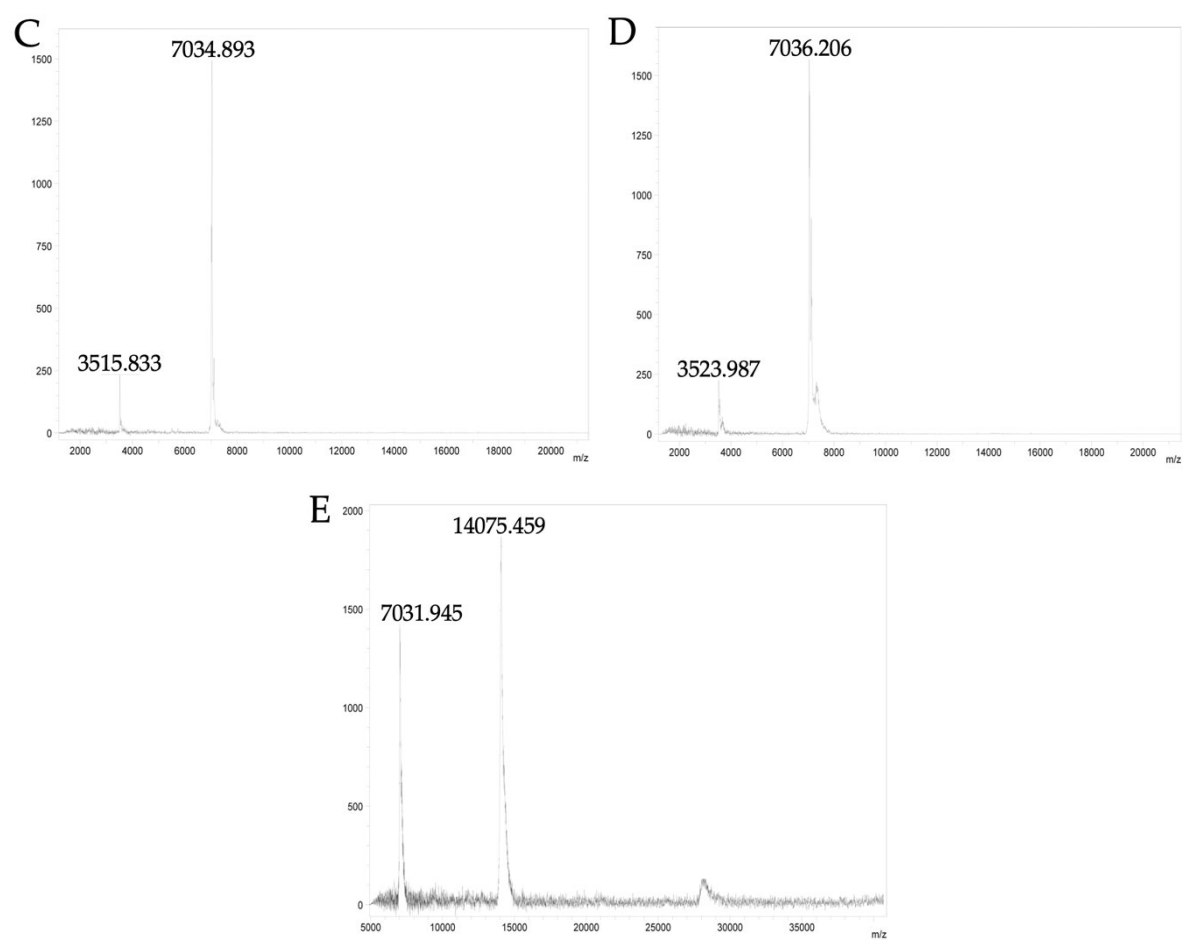

**Figure S4.** Mass spectra of intramineral proteins CCA-7 (A), CCA-14 (B), CCM-1 (C), CCM-2 (D), and CCM-3 (E).

### 3. Biomorphs Formation

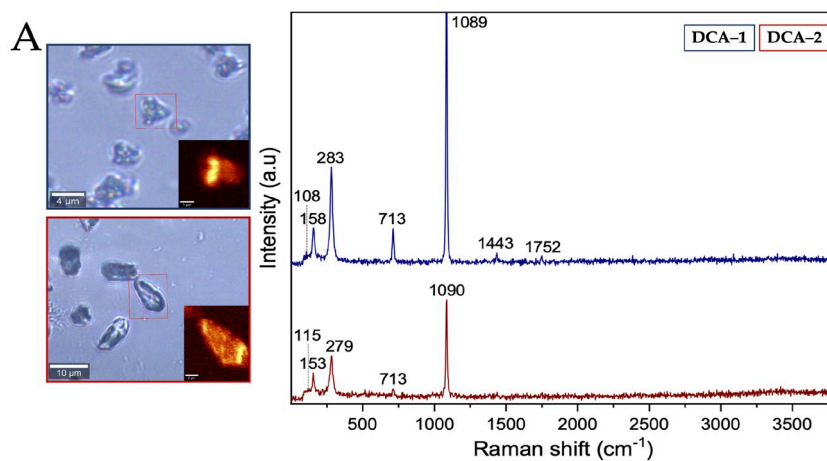

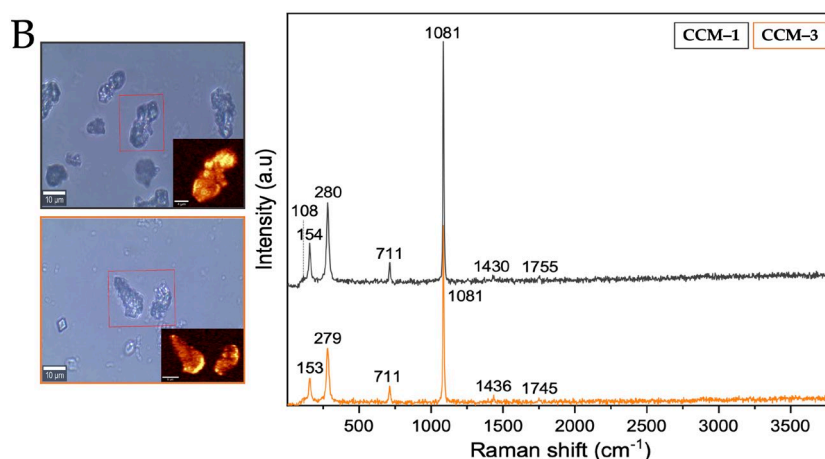

**Figure S5.** Raman spectra of calcium silica-carbonates synthesized. A: Dromaiocalcins; B: Crococalcins from crocodile *moreletti*. The blue images are optical images, and the smaller ones correspond to the mapping performed on the biomorphs.

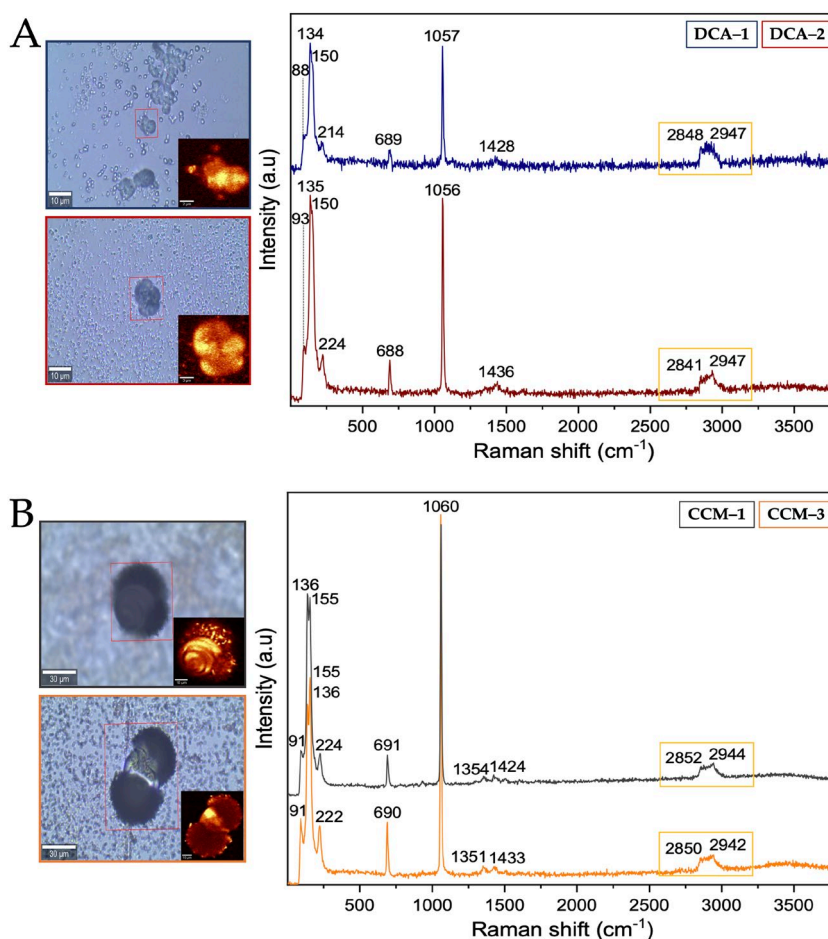

**Figure S6.** Raman spectra of barium silica-carbonates synthesized. A: Dromaiocalcins; B: Crococalcins from crocodile *moreletti*. The blue images are optical images, and the smaller ones correspond to the mapping performed on the biomorphs. The yellow box indicates the protein signal.

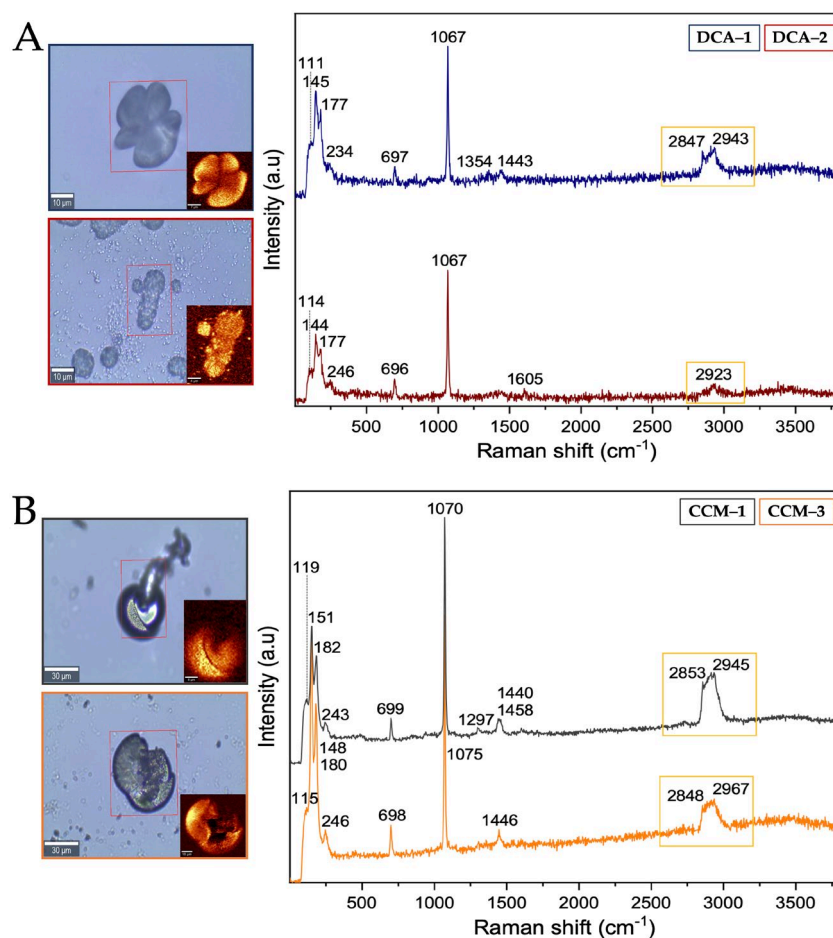

**Figure S7.** Raman spectra of strontium silica-carbonates synthesized. A: Dromaiocalcins; B: Crococalcins from crocodile *moreletti*. The blue images are optical images, and the smaller ones correspond to the mapping performed on the biomorphs. The yellow box indicates the protein signal.

#### 4. Elemental Analysis of the membranes of the ratite birds and reptiles eggshell

**Table S3.** Elemental percentage present in the membranes of the ratite birds and crocodiles eggshell.

| Element | Ostrich | Emu   | <i>C. Acutus</i> | <i>C. Moreletti</i> |
|---------|---------|-------|------------------|---------------------|
| C       | 55.97   | 55.86 | 55.01            | 59.50               |
| N       | 11.56   | 15.47 | 17.18            | 11.80               |
| O       | 25.30   | 24.26 | 23.86            | 24.39               |
| S       | 4.03    | 3.70  | 3.95             | 4.31                |
| Na      | 1.16    | 0.33  | --               | --                  |
| Mg      | 0.43    | --    | --               | --                  |
| Cl      | 1.55    | --    | --               | --                  |
| Si      | --      | 0.38  | --               | --                  |



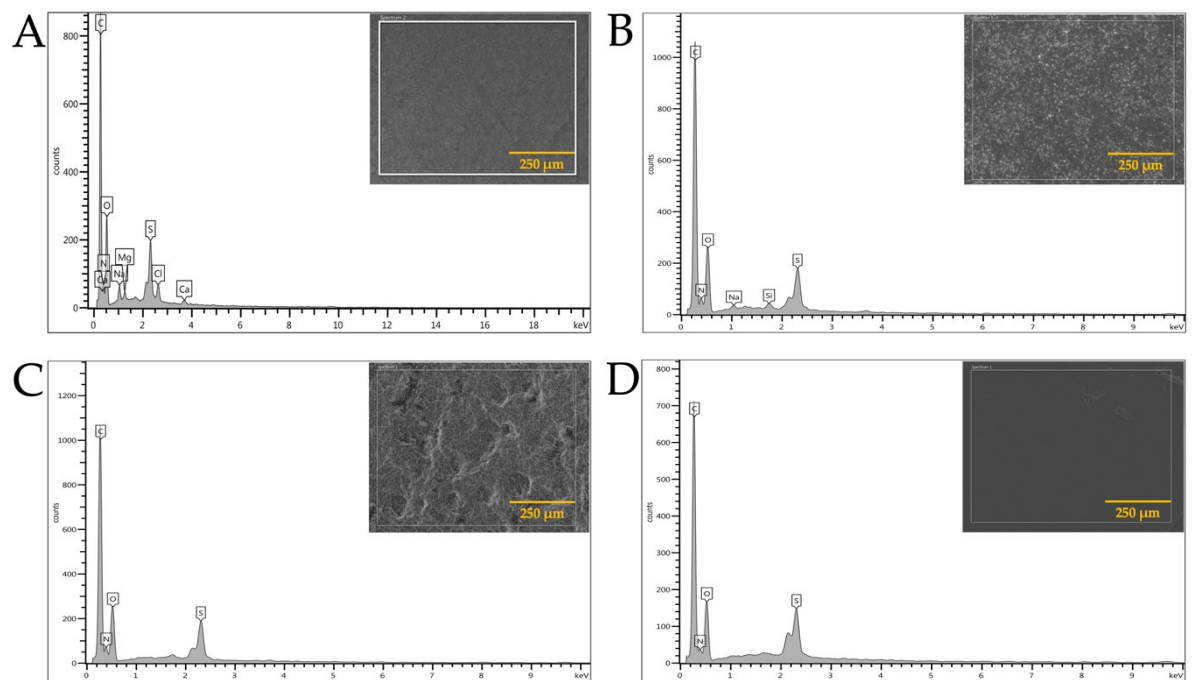

**Figure S8.** SEM-EDS images of the area outlined in white corresponding to the analysis performed on the eggshells membranes of ratite birds and crocodiles. A: Ostrich; B: Emu; C: *C. acutus*; D: *C. moreletti*.

### 5. Morphology of Eggshells of Birds and Crocodiles

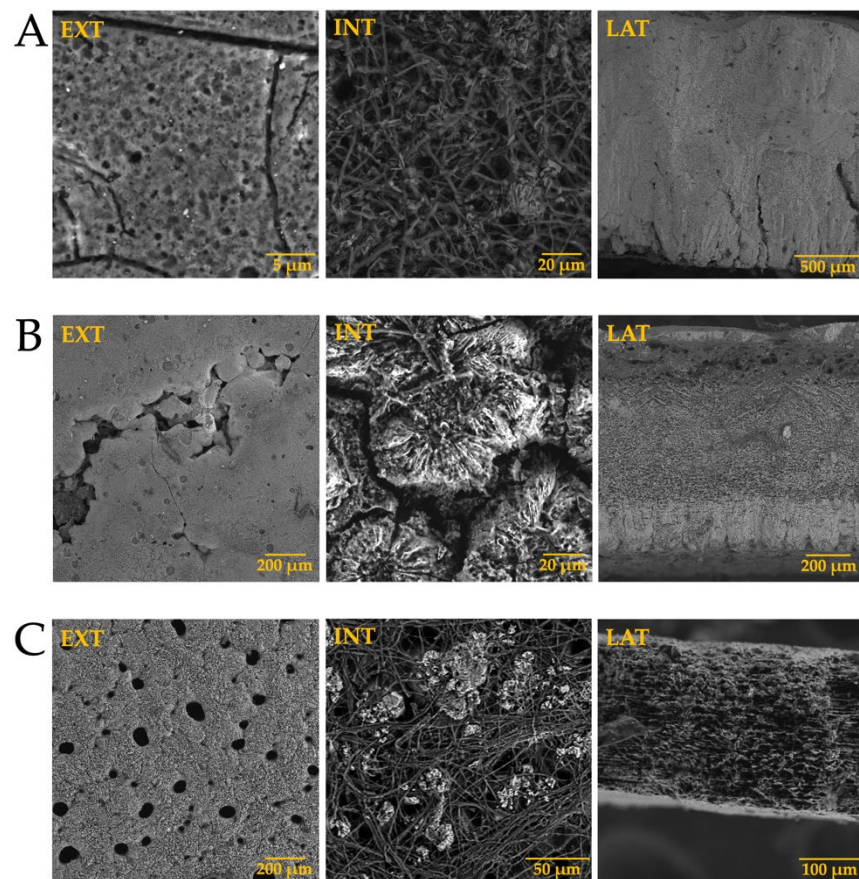

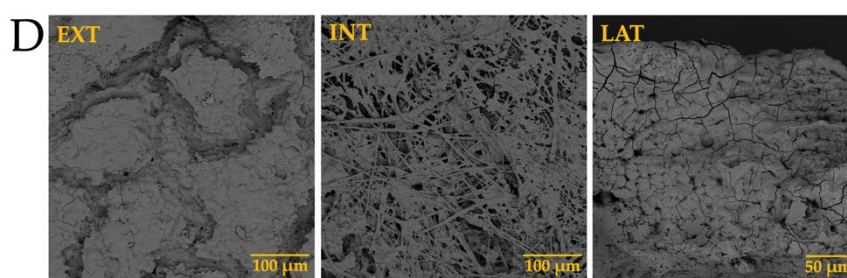

**Figure S9.** SEM images of ostrich (A), emu (B), crocodile *acutus* (C), and crocodile *moreletti* (D) eggshells. Ext: Outer part; Int: Inner part; Lat: Lateral/Intermediate section.

## 6. FTIR Analysis of Membranes of Birds and Crocodiles Eggshells

**Table S4.** Assignment of the FTIR vibrations of untreated membranes of ostrich before and after synthesis of calcium biomorphs. WO: Without CaCO<sub>3</sub>; WT: With CaCO<sub>3</sub>; SCA: Struthicalcin.\*

| Group                     | WO   | WT   | SCA-1 | SCA-2 |
|---------------------------|------|------|-------|-------|
| Amide A                   | 3290 | 3284 | 3278  | 3278  |
| Amide B                   | 3068 | 3068 | 3068  | 3068  |
| $\nu\text{CH}_2$ ASYM     | 2960 | 2960 | 2954  | 2960  |
| $\nu\text{CH}_2$ SYM      | 2929 | 2929 | 2935  | 2929  |
| Amide I                   | 1635 | 1638 | 1635  | 1635  |
| Amide II                  | 1528 | 1509 | 1516  | 1516  |
| $\delta\text{CH}_2$       | 1446 | 1446 | 1442  | 1442  |
| $\nu_3(\text{CO}_3)^{2-}$ | 1398 | 1409 | 1405  | 1398  |
| Amide III                 | 1238 | 1238 | 1235  | 1235  |
| Blue Signal               | 1072 | 1098 | 1079  | 1086  |
| $\nu_2(\text{CO}_3)^{2-}$ | --   | 872  | 872   | 872   |

\* The shift is given in cm<sup>-1</sup>.

**Table S5.** Assignment of the FTIR vibrations of untreated membranes of emu before and after synthesis of calcium biomorphs. WO: Without CaCO<sub>3</sub>; WT: With CaCO<sub>3</sub>; DCA: Dromaiocalcin.\*

| Group                     | WO   | WT   | DCA-1 | DCA-2 |
|---------------------------|------|------|-------|-------|
| Amide A                   | 3278 | 3278 | 3274  | 3274  |
| Amide B                   | 3060 | 3060 | 3060  | 3060  |
| $\nu\text{CH}_2$ ASYM     | 2960 | 2956 | 2960  | 2952  |
| $\nu\text{CH}_2$ SYM      | 2926 | 2930 | 2926  | 2930  |
| Amide I                   | 1635 | 1632 | 1632  | 1632  |
| Amide II                  | 1528 | 1522 | 1522  | 1525  |
| $\delta\text{CH}_2$       | 1448 | 1448 | 1448  | 1448  |
| $\nu_3(\text{CO}_3)^{2-}$ | 1404 | 1398 | 1396  | 1396  |
| Amide III                 | 1234 | 1234 | 1234  | 1231  |
| Blue Signal               | 1080 | 1080 | 1077  | 1077  |
| $\nu_2(\text{CO}_3)^{2-}$ | --   | 874  | 871   | --    |



\* The shift is given in  $\text{cm}^{-1}$ .

**Table S6.** Assignment of the FTIR vibrations of untreated membranes of crocodile *acutus* before and after synthesis of calcium biomorphs. WO: Without  $\text{CaCO}_3$ ; WT: With  $\text{CaCO}_3$ ; CCA: Crococalcin.\*

| Group                     | WO   | WT   | CCA-7 | CCA-14 |
|---------------------------|------|------|-------|--------|
| Amide A                   | 3322 | 3271 | 3315  | 3278   |
| Amide B                   | 3081 | --   | --    | 3081   |
| $\nu\text{CH}_2$ ASYM     | 2966 | --   | --    | 2954   |
| $\nu\text{CH}_2$ SYM      | 2929 | --   | --    | 2929   |
| Amide I                   | 1635 | 1635 | 1635  | 1635   |
| Amide II                  | 1540 | 1521 | 1521  | 1514   |
| $\delta\text{CH}_2$       | 1445 | 1432 | 1432  | 1438   |
| $\nu_3(\text{CO}_3)^{2-}$ | 1400 | 1407 | 1394  | 1400   |
| Amide III                 | 1241 | 1216 | 1229  | 1229   |
| Blue Signal               | 1071 | 1077 | 1077  | 1077   |
| $\nu_2(\text{CO}_3)^{2-}$ | --   | 874  | 874   | 874    |

\* The shift is given in  $\text{cm}^{-1}$ .

**Table S7.** Assignment of the FTIR vibrations of untreated membranes of crocodile *moreletti* before and after synthesis of calcium biomorphs. WO: Without  $\text{CaCO}_3$ ; WT: With  $\text{CaCO}_3$ ; CCM: Crococalcin.\*

| Group                     | WO   | WT   | CCM-1 | CCM-3 |
|---------------------------|------|------|-------|-------|
| Amide A                   | 3284 | 3278 | 3290  | 3278  |
| Amide B                   | 3081 | 3062 | --    | 3068  |
| $\nu\text{CH}_2$ ASYM     | 2960 | 2960 | --    | 2960  |
| $\nu\text{CH}_2$ SYM      | 2929 | 2922 | --    | 2929  |
| Amide I                   | 1632 | 1635 | 1639  | 1632  |
| Amide II                  | 1517 | 1513 | 1517  | 1517  |
| $\delta\text{CH}_2$       | 1444 | 1437 | 1434  | 1437  |
| $\nu_3(\text{CO}_3)^{2-}$ | 1392 | 1399 | 1402  | 1409  |
| Amide III                 | 1236 | 1222 | 1218  | 1225  |
| Blue Signal               | 1072 | 1072 | 1072  | 1076  |
| $\nu_2(\text{CO}_3)^{2-}$ | --   | 871  | 871   | 874   |

\* The shift is given in  $\text{cm}^{-1}$ .

**Table S8.** Assignment of the FTIR vibrations of biocalcified membranes of ostrich before and after synthesis of calcium biomorphs. WO: Without  $\text{CaCO}_3$ ; WT: With  $\text{CaCO}_3$ ; SCA: Struthicalcin.\*

| Group                 | WO   | WT   | SCA-1 | SCA-2 |
|-----------------------|------|------|-------|-------|
| (OH)-                 | 3367 | --   | --    | --    |
| Amide A               | 3265 | 3284 | 3284  | 3284  |
| $\nu\text{CH}_2$ ASYM | 2922 | 2966 | 2954  | 2960  |
| $\nu\text{CH}_2$ SYM  | 2852 | 2929 | 2922  | 2922  |
| Amide I               | 1635 | 1641 | 1648  | 1641  |
| Amide II              | 1540 | 1527 | 1521  | 1534  |

|                               |      |      |      |      |
|-------------------------------|------|------|------|------|
| $\delta\text{CH}_2$           | 1457 | 1438 | 1451 | 1445 |
| $\nu_3(\text{CO}_3)^{2-}$     | 1432 | 1407 | 1407 | 1407 |
| <b>Amide III</b>              | 1248 | 1241 | 1241 | 1235 |
| $\nu_{1,3}(\text{PO}_4)^{3-}$ | 1102 | 1089 | 1089 | 1083 |
|                               | 1026 | 1019 | 1026 | 1019 |
| $\nu_2(\text{CO}_3)^{2-}$     | --   | 867  | 874  | 867  |
| $\nu_{2,4}(\text{PO}_4)^{3-}$ | 664  | 601  | 601  | 601  |
|                               | 550  | 557  | 557  | 557  |

\* The shift is given in  $\text{cm}^{-1}$ .

**Table S9.** Assignment of the FTIR vibrations of biocalcified membranes of emu before and after synthesis of calcium biomorphs. WO: Without  $\text{CaCO}_3$ ; WT: With  $\text{CaCO}_3$ ; DCA: Dromaicalcin.\*

| Group                         | WO   | WT   | DCA-1 | DCA-2 |
|-------------------------------|------|------|-------|-------|
| (OH) $^-$                     | 3341 | --   | --    | --    |
| <b>Amide A</b>                | 3284 | 3271 | 3278  | 3278  |
| $\nu\text{CH}_2$ ASYM         | 2992 | 2966 | 2960  | 2960  |
| $\nu\text{CH}_2$ SYM          | 2929 | 2929 | 2922  | 2929  |
| <b>Amide I</b>                | 1635 | 1635 | 1635  | 1635  |
| <b>Amide II</b>               | 1534 | 1527 | 1527  | 1521  |
| $\delta\text{CH}_2$           | 1445 | 1438 | 1445  | 1438  |
| $\nu_3(\text{CO}_3)^{2-}$     | 1413 | 1407 | 1407  | 1407  |
| <b>Amide III</b>              | 1235 | 1235 | 1235  | 1235  |
| $\nu_{1,3}(\text{PO}_4)^{3-}$ | 1096 | 1096 | 1089  | 1089  |
|                               | 1026 | 1032 | 1032  | 1026  |
| $\nu_2(\text{CO}_3)^{2-}$     | --   | 867  | 867   | 874   |
| $\nu_{2,4}(\text{PO}_4)^{3-}$ | 601  | 601  | 601   | 601   |
|                               | 557  | 557  | 557   | 557   |

\* The shift is given in  $\text{cm}^{-1}$ .

**Table S10.** Assignment of the FTIR vibrations of biocalcified membranes of crocodile *acutus* before and after synthesis of calcium biomorphs. WO: Without  $\text{CaCO}_3$ ; WT: With  $\text{CaCO}_3$ ; CCA: Crococalcin.\*

| Group                         | WO   | WT   | CCA-7 | CCA-14 |
|-------------------------------|------|------|-------|--------|
| (OH) $^-$                     | 3360 | --   | --    | --     |
| <b>Amide A</b>                | 3290 | 3278 | 3284  | 3296   |
| <b>Amide I</b>                | 1641 | 1635 | 1648  | 1648   |
| <b>Amide II</b>               | 1534 | 1514 | 1514  | 1521   |
| $\delta\text{CH}_2$           | 1470 | 1445 | 1445  | 1451   |
| $\nu_3(\text{CO}_3)^{2-}$     | 1420 | 1407 | 1407  | 1407   |
| <b>Amide III</b>              | 1235 | 1235 | --    | --     |
| $\nu_{1,3}(\text{PO}_4)^{3-}$ | 1083 | 1077 | 1089  | 1089   |
|                               | 1019 | 1026 | 1019  | 1019   |
| $\nu_2(\text{CO}_3)^{2-}$     | --   | 874  | 867   | 867    |
| $\nu_{2,4}(\text{PO}_4)^{3-}$ | 595  | 601  | 601   | 601    |

|  |     |     |     |     |
|--|-----|-----|-----|-----|
|  | 557 | 550 | 557 | 557 |
|--|-----|-----|-----|-----|

\* The shift is given in  $\text{cm}^{-1}$ .

**Table S11.** Assignment of the FTIR vibrations of biocalcified membranes of crocodile *moreletti* before and after synthesis of calcium biomorphs. WO: Without  $\text{CaCO}_3$ ; WT: With  $\text{CaCO}_3$ ; CCM: Crococalcin.\*

| Group                         | WO   | WT   | CCM-1 | CCM-3 |
|-------------------------------|------|------|-------|-------|
| (OH) <sup>-</sup>             | 3380 | 3385 | 3385  | --    |
| Amide A                       | 3271 | 3278 | 3284  | 3278  |
| $\nu\text{CH}_2$ ASYM         | 2966 | 2966 | 2966  | 2966  |
| $\nu\text{CH}_2$ SYM          | 2935 | 2929 | 2935  | 2935  |
| Amide I                       | 1635 | 1635 | 1641  | 1635  |
| Amide II                      | 1534 | 1527 | --    | 1514  |
| $\delta\text{CH}_2$           | 1451 | 1451 | 1445  | 1445  |
| $\nu_3(\text{CO}_3)^{2-}$     | 1413 | 1400 | 1407  | 1400  |
| Amide III                     | 1229 | 1235 | 1241  | 1235  |
| $\nu_{1,3}(\text{PO}_4)^{3-}$ | 1071 | 1077 | 1077  | 1077  |
|                               | 1032 | 1032 | 1045  | 1045  |
| $\nu_2(\text{CO}_3)^{2-}$     | --   | --   | 874   | 874   |
| $\nu_4(\text{PO}_4)^{3-}$     |      |      |       |       |

\* The shift is given in  $\text{cm}^{-1}$ .

**Table S12.** Assignment of the FTIR vibrations of biosilicified membranes of ostrich before and after synthesis of calcium biomorphs. WO: Without  $\text{CaCO}_3$ ; WT: With  $\text{CaCO}_3$ ; SCA: Struthiocalcin.\*

| Group                           | WO   | WT   | SCA-1 | SCA-2 |
|---------------------------------|------|------|-------|-------|
| $\nu(\text{OH})^-$              | 3373 | --   | --    | --    |
| $\delta(\text{OH})^-$           | 1622 | 1635 | 1635  | 1641  |
| Amide III                       | 1172 | 1172 | 1179  | 1179  |
| $\nu(\text{Si}_2\text{O})$ ASYM | 1071 | 1058 | 1052  | 1052  |
| $\nu(\text{Si}_2\text{O})$ SYM  | 956  | 944  | 950   | 956   |
| $\delta(\text{Si}_2\text{O})$   | --   | 798  | 798   | 791   |

\* The shift is given in  $\text{cm}^{-1}$ .

**Table S13.** Assignment of the FTIR vibrations of biosilicified membranes of emu before and after synthesis of calcium biomorphs. WO: Without  $\text{CaCO}_3$ ; WT: With  $\text{CaCO}_3$ ; SCA: Dromaiocalcin.\*

| Group                           | WO   | WT   | DCA-1 | DCA-2 |
|---------------------------------|------|------|-------|-------|
| $\nu(\text{OH})^-$              | 3385 | --   | --    | --    |
| $\delta(\text{OH})^-$           | 1635 | --   | --    | --    |
| Amide III                       | 1185 | 1172 | 1166  | 1172  |
| $\nu(\text{Si}_2\text{O})$ ASYM | 1045 | 1052 | 1058  | 1058  |
| $\nu(\text{Si}_2\text{O})$ SYM  | 950  | 956  | 956   | 956   |
| $\delta(\text{Si}_2\text{O})$   | 791  | 798  | 791   | 791   |

\* The shift is given in  $\text{cm}^{-1}$ .

**Table S14.** Assignment of the FTIR vibrations of biosilicified membranes of crocodile *acutus* before and after synthesis of calcium biomorphs. WO: Without  $\text{CaCO}_3$ ; WT: With  $\text{CaCO}_3$ ; CCA: Crococalcin.\*

| Group                                    | WO   | WT   | CCA-7 | CCA-14 |
|------------------------------------------|------|------|-------|--------|
| $\nu(\text{OH})^-$                       | 3385 | --   | --    | --     |
| $\delta(\text{OH})^-$                    | 1635 | 1635 | 1635  | 1635   |
| Amide III                                | 1172 | 1166 | 1159  | 1159   |
| $\nu(\text{Si}_2\text{O})_{\text{ASYM}}$ | 1058 | 1039 | 1045  | 1039   |
| $\nu(\text{Si}_2\text{O})_{\text{SYM}}$  | 944  | 944  | 956   | 950    |
| $\delta(\text{Si}_2\text{O})$            | 791  | 791  | 791   | 791    |

\* The shift is given in  $\text{cm}^{-1}$ .

**Table S15.** Assignment of the FTIR vibrations of biosilicified membranes of crocodile *moreletti* before and after synthesis of calcium biomorphs. WO: Without  $\text{CaCO}_3$ ; WT: With  $\text{CaCO}_3$ ; CCA: Crococalcin.\*

| Group                                    | WO   | WT   | CCM-1 | CCM-3 |
|------------------------------------------|------|------|-------|-------|
| $\nu(\text{OH})^-$                       | 3373 | --   | --    | --    |
| $\delta(\text{OH})^-$                    | 1628 | 1635 | 1635  | 1635  |
| Amide III                                | 1172 | 1166 | 1191  | 1185  |
| $\nu(\text{Si}_2\text{O})_{\text{ASYM}}$ | 1045 | 1052 | 1052  | 1045  |
| $\nu(\text{Si}_2\text{O})_{\text{SYM}}$  | 944  | 963  | 963   | 963   |
| $\delta(\text{Si}_2\text{O})$            | 791  | 791  | 791   | 791   |

\* The shift is given in  $\text{cm}^{-1}$ .
